# Supplementary material
Source: publisher figshare collection journal article supplement (https://tandf.figshare.com/ndownloader/files/30783534)
Supplement: Supplementary file 1 [file 30783534]

**Supplementary file for the paper titled “Adaptive Process Monitoring Using  
Covariate Information”**

To save some space in the main paper, some numerical results are presented in this supplemental file. First, Tables S.1-S.2 present the calculated actual  $ARL_1$  values of the proposed EWMAC chart in cases when  $p = 1$  or 5 and other setups are the same as those in Table 2.

In Table S.3, we investigate the impact of model parameters  $\beta$  on the performance of the EWMAC chart in cases when  $\beta_0 = 0$ ,  $\beta = (\beta, \beta, \beta)^T$ ,  $\beta = 0.25, 0.5$ , or 1,  $ARL_{\mathbf{X},0} = ARL_{Y,0} = 200$ ,  $\lambda = 0.1, 0.3$ , or 0.5, and other setups are the same as those in the example of Table 2. From Table S.3, it can be seen that the  $ARL_1$  values increase with  $\beta$  for detecting shifts of types (I) and (II) when  $\lambda, \nu$  and the shift type are given. That is because the shifts are not or minimally related to the covariates in such cases, and the mean shift in  $Y$  is about  $\delta/\sigma_Y = \delta/\sqrt{\sigma_\varepsilon^2 + 3\beta^2\sigma_x^2}$  times of  $\sigma_Y$ . So, the re-scaled shift size  $\delta/\sigma_Y$  would be smaller when  $\beta$  gets larger. Consequently, the  $ARL_1$  values would be larger. For detecting shifts of types (III) and (IV), the opposite is true. Namely, the  $ARL_1$  values would decrease when  $\beta$  increases. That is because the re-scaled shift size in such cases is about  $3\beta\delta_x/\sqrt{\sigma_\varepsilon^2 + 3\beta^2\sigma_x^2} = 3\delta_x/\sqrt{(\sigma_\varepsilon/\beta)^2 + 3\sigma_x^2}$ , which would increase when  $\beta$  increases.

Table S.4 shows the actual  $ARL_1$  values of the EWMAC chart in cases when  $p = 50$ ,  $f(x)$  is linear,  $\beta_0 = 0$ , the first 10 elements of  $\beta$  are all 0.5, and the remaining elements are 0. Table S.5 presents the actual  $ARL_1$  values of the EWMAC chart in cases when  $p = 1$ , and  $f(x) = 0.5 \exp(x)$ . Other setups in the examples of Tables S.4 and S.5 are the same as those in Table 2.

Figure S.1 shows the actual  $SDARL_{Y,0}$  values of the EWMAC chart in cases when  $p = 1, 3$  or 5 and other setups are the same as those in Figure 2. In Figure S.2, we investigate the effect of IC sample size  $m$  on  $SDARL_{Y,0}$  of the proposed method in cases when  $p = 50$  and  $\lambda = 0.1, 0.2$  or 0.3. Finally, we present the the actual  $SDARL_{Y,0}$  values of the EWMAC chart in Figure S.3 in cases when  $p = 1$ ,  $f(x) = 0.5 \exp(x)$  and other setups are the same as those in Figure 6.

Table S.1: Calculated  $ARL_1$  values and their standard errors (in parentheses) of the EWMAC chart when the weighting function is chosen to be  $\phi_L(x; \lambda, h_{\mathbf{X}})$ ,  $ARL_{Y,0} = 200$ , and  $p = 1$ . In each row, numbers in italic denote cases with the smallest  $ARL_1$  values when comparing different  $ARL_{0,\mathbf{X}}$  values with  $\lambda$  fixed, and numbers in bold denote cases with the smallest  $ARL_1$  values when comparing different  $\lambda$  values with  $ARL_{\mathbf{X},0}$  fixed.

| Type $\nu$ | $ARL_{\mathbf{X},0} = 100$ |                    |                    | $ARL_{\mathbf{X},0} = 200$ |                    |                   | $ARL_{\mathbf{X},0} = 300$ |                    |                   |                   |
|------------|----------------------------|--------------------|--------------------|----------------------------|--------------------|-------------------|----------------------------|--------------------|-------------------|-------------------|
|            | $\lambda = 0.1$            | $\lambda = 0.3$    | $\lambda = 0.5$    | $\lambda = 0.1$            | $\lambda = 0.3$    | $\lambda = 0.5$   | $\lambda = 0.1$            | $\lambda = 0.3$    | $\lambda = 0.5$   |                   |
| (I)        | 1                          | 14.39(0.08)        | <b>13.97(0.11)</b> | 17.75(0.16)                | <b>11.80(0.07)</b> | 13.09(0.10)       | 16.90(0.15)                | <b>11.21(0.06)</b> | 12.73(0.10)       | 16.55(0.15)       |
|            | 2                          | 8.27(0.04)         | <b>7.04(0.04)</b>  | 8.16(0.06)                 | 7.04(0.04)         | <b>6.74(0.04)</b> | 7.86(0.06)                 | 6.76(0.03)         | <b>6.61(0.03)</b> | 7.76(0.06)        |
|            | 3                          | 5.81(0.02)         | <b>4.54(0.02)</b>  | 4.81(0.02)                 | 5.04(0.02)         | <b>4.38(0.02)</b> | 4.67(0.03)                 | 4.87(0.02)         | <b>4.32(0.02)</b> | 4.62(0.03)        |
|            | 4                          | 4.50(0.02)         | 3.35(0.02)         | <b>3.29(0.02)</b>          | 3.95(0.02)         | 3.25(0.02)        | <b>3.22(0.02)</b>          | 3.82(0.02)         | 3.21(0.01)        | <b>3.19(0.01)</b> |
| (II)       | 1                          | 13.72(0.09)        | <b>13.16(0.10)</b> | 16.69(0.15)                | <b>11.32(0.06)</b> | 12.42(0.10)       | 15.92(0.14)                | <b>10.79(0.06)</b> | 12.10(0.09)       | 15.61(0.14)       |
|            | 2                          | 7.83(0.04)         | <b>6.60(0.04)</b>  | 7.55(0.06)                 | 6.71(0.03)         | <b>6.34(0.03)</b> | 7.31(0.06)                 | 6.44(0.03)         | <b>6.23(0.03)</b> | 7.19(0.05)        |
|            | 3                          | 5.50(0.02)         | <b>4.25(0.02)</b>  | 4.43(0.03)                 | 4.79(0.02)         | <b>4.11(0.02)</b> | 4.31(0.03)                 | 4.62(0.02)         | <b>4.05(0.02)</b> | 4.27(0.03)        |
|            | 4                          | 4.26(0.01)         | 3.14(0.01)         | <b>3.04(0.01)</b>          | 3.75(0.01)         | 3.05(0.01)        | <b>2.97(0.01)</b>          | 3.63(0.01)         | 3.01(0.01)        | <b>2.94(0.01)</b> |
| (III)      | 1                          | <b>35.73(0.28)</b> | 62.05(0.59)        | 83.34(0.79)                | <b>41.42(0.34)</b> | 68.22(0.65)       | 85.12(0.84)                | <b>44.39(0.37)</b> | 70.17(0.67)       | 86.47(0.85)       |
|            | 2                          | <b>24.01(0.17)</b> | 40.53(0.37)        | 56.25(0.54)                | <b>27.04(0.20)</b> | 45.11(0.42)       | 59.57(0.57)                | <b>28.76(0.22)</b> | 46.49(0.43)       | 61.06(0.59)       |
|            | 3                          | <b>17.68(0.12)</b> | 27.67(0.24)        | 40.19(0.39)                | <b>19.61(0.13)</b> | 30.86(0.27)       | 42.89(0.41)                | <b>20.67(0.14)</b> | 31.91(0.28)       | 44.20(0.43)       |
|            | 4                          | <b>13.73(0.08)</b> | 19.95(0.17)        | 29.01(0.27)                | <b>15.16(0.09)</b> | 22.03(0.19)       | 31.21(0.29)                | <b>15.90(0.10)</b> | 22.95(0.20)       | 32.00(0.30)       |
| (IV)       | 1                          | <b>38.18(0.31)</b> | 71.45(0.68)        | 92.71(0.91)                | <b>46.81(0.39)</b> | 80.65(0.77)       | 99.76(0.98)                | <b>51.88(0.44)</b> | 84.11(0.81)       | 102.84(1.01)      |
|            | 2                          | <b>26.85(0.20)</b> | 51.98(0.49)        | 72.77(0.71)                | <b>32.38(0.25)</b> | 60.72(0.58)       | 79.76(0.79)                | <b>35.91(0.28)</b> | 64.10(0.61)       | 82.85(0.81)       |
|            | 3                          | <b>20.18(0.14)</b> | 38.25(0.35)        | 57.77(0.56)                | <b>24.12(0.17)</b> | 45.74(0.43)       | 63.92(0.62)                | <b>26.53(0.19)</b> | 49.28(0.46)       | 67.05(0.65)       |
|            | 4                          | <b>16.02(0.10)</b> | 28.88(0.25)        | 45.85(0.44)                | <b>18.87(0.12)</b> | 34.98(0.32)       | 52.02(0.50)                | <b>20.69(0.14)</b> | 37.73(0.34)       | 54.66(0.53)       |

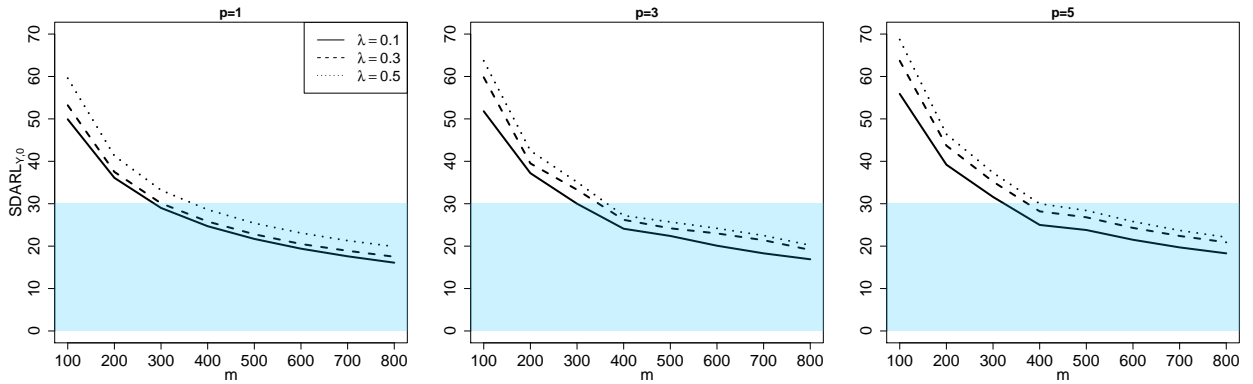

Figure S.1: Actual  $SDARL_{Y,0}$  values of the EWMAC chart when the IC data size  $m$  changes from 100 to 800,  $p = 1, 3$  or  $5$ . Shaded area denotes the  $SDARL_{Y,0}$  values that are within 15% of the nominal  $ARL_{Y,0}$  value 200.

Table S.2: Calculated  $ARL_1$  values and their standard errors (in parentheses) of the EWMAC chart when the weighting function is chosen to be  $\phi_L(x; \lambda, h_{\mathbf{X}})$ ,  $ARL_{Y,0} = 200$ , and  $p = 5$ . In each row, numbers in italic denote cases with the smallest  $ARL_1$  values when comparing different  $ARL_{0,\mathbf{X}}$  values with  $\lambda$  fixed, and numbers in bold denote cases with the smallest  $ARL_1$  values when comparing different  $\lambda$  values with  $ARL_{\mathbf{X},0}$  fixed.

| Type $\nu$ | $ARL_{\mathbf{X},0} = 100$ |                                |                 | $ARL_{\mathbf{X},0} = 200$   |                    |                 | $ARL_{\mathbf{X},0} = 300$   |                    |                 |             |
|------------|----------------------------|--------------------------------|-----------------|------------------------------|--------------------|-----------------|------------------------------|--------------------|-----------------|-------------|
|            | $\lambda = 0.1$            | $\lambda = 0.3$                | $\lambda = 0.5$ | $\lambda = 0.1$              | $\lambda = 0.3$    | $\lambda = 0.5$ | $\lambda = 0.1$              | $\lambda = 0.3$    | $\lambda = 0.5$ |             |
| (I)        | 1                          | 27.62(0.20) <b>26.62(0.21)</b> | 33.57(0.32)     | <b>18.13(0.12)</b>           | 22.29(0.19)        | 29.06(0.27)     | <b>16.89(0.11)</b>           | 21.28(0.18)        | 27.92(0.26)     |             |
|            | 2                          | 14.44(0.08) <b>12.96(0.08)</b> | 16.05(0.14)     | <b>10.40(0.06)</b>           | 11.36(0.09)        | 14.28(0.12)     | <b>9.87(0.05)</b>            | 10.98(0.08)        | 13.82(0.12)     |             |
|            | 3                          | 9.53(0.04) <b>7.73(0.04)</b>   | 9.15(0.07)      | 7.20(0.04) <b>6.97(0.04)</b> | 8.25(0.07)         |                 | 6.88(0.04) <b>6.78(0.04)</b> | 7.99(0.06)         |                 |             |
|            | 4                          | 7.08(0.03) <b>5.34(0.03)</b>   | 5.83(0.04)      | 5.52(0.02) <b>4.91(0.02)</b> | 5.36(0.03)         |                 | 5.29(0.02) <b>4.81(0.02)</b> | 5.25(0.03)         |                 |             |
| (II)       | 1                          | 21.36(0.15) <b>20.25(0.16)</b> | 25.81(0.24)     | <b>14.87(0.09)</b>           | 17.50(0.15)        | 22.76(0.21)     | <b>13.95(0.09)</b>           | 16.86(0.14)        | 21.98(0.20)     |             |
|            | 2                          | 10.80(0.06) <b>9.09(0.06)</b>  | 10.99(0.09)     | <b>8.15(0.04)</b>            | 8.16(0.05)         | 9.94(0.08)      | <b>7.76(0.04)</b>            | 7.95(0.05)         | 9.63(0.08)      |             |
|            | 3                          | 7.14(0.02) <b>5.42(0.02)</b>   | 5.94(0.03)      | 5.60(0.02) <b>5.00(0.02)</b> | 5.48(0.03)         |                 | 5.37(0.02) <b>4.90(0.02)</b> | 5.36(0.03)         |                 |             |
|            | 4                          | 5.40(0.02) <b>3.82(0.02)</b>   | 3.85(0.02)      | 4.30(0.02) <b>3.57(0.02)</b> | 3.63(0.02)         |                 | 4.14(0.02) <b>3.51(0.02)</b> | 3.56(0.02)         |                 |             |
| (III)      | 1                          | <b>12.02(0.07)</b>             | 15.94(0.13)     | 22.24(0.21)                  | <b>12.96(0.08)</b> | 17.16(0.14)     | 23.70(0.22)                  | <b>13.63(0.08)</b> | 17.94(0.15)     | 24.40(0.23) |
|            | 2                          | <b>8.30(0.04)</b>              | 9.68(0.07)      | 12.99(0.11)                  | <b>8.88(0.05)</b>  | 10.37(0.08)     | 13.57(0.12)                  | <b>9.26(0.05)</b>  | 10.70(0.08)     | 14.01(0.12) |
|            | 3                          | <b>6.31(0.03)</b>              | 6.63(0.04)      | 8.28(0.07)                   | <b>6.71(0.03)</b>  | 7.01(0.05)      | 8.75(0.07)                   | <b>6.97(0.03)</b>  | 7.23(0.05)      | 8.97(0.07)  |
|            | 4                          | <b>5.05(0.02)</b>              | 4.99(0.03)      | 5.84(0.04)                   | <b>5.38(0.02)</b>  | 5.23(0.03)      | 6.10(0.04)                   | <b>5.60(0.02)</b>  | 5.38(0.03)      | 6.25(0.04)  |
| (IV)       | 1                          | <b>12.26(0.07)</b>             | 16.75(0.14)     | 23.59(0.24)                  | <b>13.37(0.08)</b> | 18.37(0.15)     | 25.43(0.24)                  | <b>14.21(0.09)</b> | 19.29(0.16)     | 26.39(0.25) |
|            | 2                          | <b>8.57(0.05)</b>              | 10.43(0.08)     | 14.34(0.12)                  | <b>9.29(0.05)</b>  | 11.31(0.09)     | 15.35(0.13)                  | <b>9.82(0.05)</b>  | 11.92(0.09)     | 15.93(0.14) |
|            | 3                          | <b>6.55(0.03)</b>              | 7.22(0.05)      | 9.47(0.08)                   | <b>7.06(0.03)</b>  | 7.80(0.05)      | 10.10(0.09)                  | <b>7.43(0.03)</b>  | 8.13(0.06)      | 10.48(0.09) |
|            | 4                          | <b>5.27(0.02)</b>              | 5.44(0.03)      | 6.65(0.05)                   | <b>5.69(0.02)</b>  | 5.83(0.04)      | 7.11(0.05)                   | <b>6.00(0.02)</b>  | 6.07(0.04)      | 7.39(0.06)  |

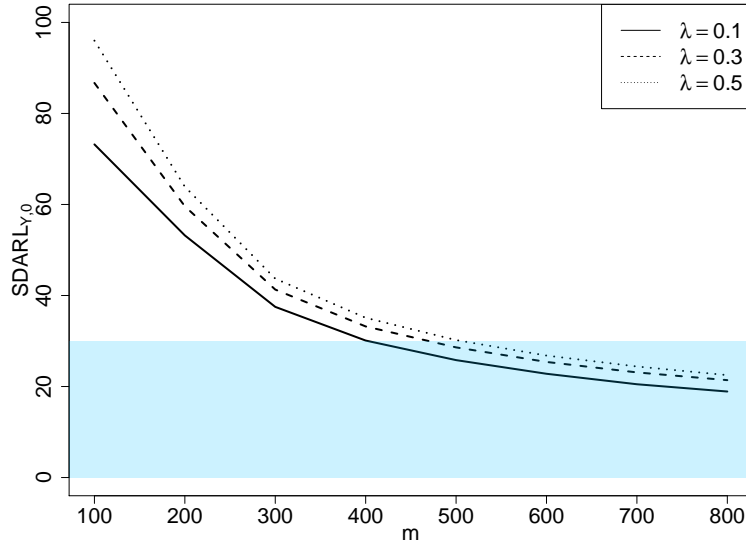

Figure S.2: Actual  $SDARL_{Y,0}$  values of the EWMAC chart when the IC data size  $m$  changes from 100 to 800 and  $p = 50$ . Shaded area denotes the  $SDARL_{Y,0}$  values that are within 15% of the nominal  $ARL_{Y,0}$  value 200.

Table S.3: Calculated  $ARL_1$  values and their standard errors (in parentheses) of the EWMAC chart with weighting function  $\phi_L(x; \lambda, h_{\mathbf{X}})$  for detecting the mean shifts in cases when  $p = 3$ ,  $ARL_{\mathbf{X},0} = ARL_{Y,0} = 200$  and  $\beta$  is chosen to be 0.25, 0.50 or 1.00. In each row, numbers in bold denote cases with the smallest  $ARL_1$  values when comparing cases with different  $\lambda$  values with the  $\beta$  value fixed.

| Type $\nu$ | $\beta = 0.25$     |                   |                   | $\beta = 0.50$     |                   |                   | $\beta = 1.00$     |                   |                 |
|------------|--------------------|-------------------|-------------------|--------------------|-------------------|-------------------|--------------------|-------------------|-----------------|
|            | $\lambda = 0.1$    | $\lambda = 0.3$   | $\lambda = 0.5$   | $\lambda = 0.1$    | $\lambda = 0.3$   | $\lambda = 0.5$   | $\lambda = 0.1$    | $\lambda = 0.3$   | $\lambda = 0.5$ |
| (I) 1      | <b>11.27(0.06)</b> | 12.38(0.09)       | 15.93(0.14)       | <b>14.99(0.09)</b> | 17.91(0.15)       | 23.19(0.21)       | <b>27.11(0.20)</b> | 34.92(0.32)       | 44.61(0.42)     |
| 2          | 6.79(0.03)         | <b>6.43(0.03)</b> | 7.43(0.06)        | <b>8.82(0.04)</b>  | 9.02(0.06)        | 10.98(0.09)       | <b>15.39(0.09)</b> | 18.43(0.15)       | 24.09(0.22)     |
| 3          | 4.87(0.02)         | <b>4.18(0.02)</b> | 4.42(0.03)        | 6.18(0.03)         | <b>5.69(0.03)</b> | 6.42(0.05)        | <b>10.38(0.06)</b> | 11.24(0.08)       | 14.36(0.12)     |
| 4          | 3.82(0.01)         | 3.08(0.01)        | <b>3.03(0.01)</b> | 4.79(0.02)         | <b>4.08(0.02)</b> | 4.27(0.03)        | 7.82(0.04)         | <b>7.74(0.04)</b> | 9.31(0.08)      |
| (II) 1     | <b>10.64(0.06)</b> | 11.49(0.09)       | 14.59(0.13)       | <b>13.29(0.08)</b> | 15.31(0.12)       | 19.79(0.18)       | <b>21.16(0.15)</b> | 26.92(0.24)       | 34.92(0.33)     |
| 2          | 6.31(0.03)         | <b>5.82(0.03)</b> | 6.67(0.05)        | 7.59(0.04)         | <b>7.42(0.04)</b> | 8.76(0.07)        | <b>11.34(0.06)</b> | 12.61(0.10)       | 16.09(0.14)     |
| 3          | 4.51(0.02)         | <b>3.79(0.02)</b> | 3.93(0.02)        | 5.31(0.02)         | <b>4.65(0.02)</b> | 5.01(0.03)        | 7.60(0.04)         | <b>7.42(0.04)</b> | 8.87(0.07)      |
| 4          | 3.53(0.01)         | 2.83(0.01)        | <b>2.70(0.01)</b> | 4.11(0.02)         | 3.37(0.02)        | <b>3.36(0.02)</b> | 5.68(0.03)         | <b>5.12(0.03)</b> | 5.66(0.04)      |
| (III) 1    | <b>22.48(0.16)</b> | 40.35(0.37)       | 58.29(0.56)       | <b>19.03(0.13)</b> | 28.03(0.25)       | 38.63(0.37)       | <b>17.21(0.12)</b> | 22.72(0.20)       | 30.02(0.28)     |
| 2          | <b>14.70(0.09)</b> | 24.12(0.21)       | 36.27(0.34)       | <b>12.63(0.07)</b> | 16.92(0.14)       | 23.54(0.21)       | <b>11.59(0.07)</b> | 13.94(0.11)       | 18.21(0.16)     |
| 3          | <b>10.76(0.06)</b> | 15.66(0.12)       | 24.00(0.22)       | <b>9.38(0.05)</b>  | 11.37(0.08)       | 15.34(0.14)       | <b>8.65(0.04)</b>  | 9.42(0.07)        | 12.01(0.10)     |
| 4          | <b>8.50(0.04)</b>  | 11.07(0.08)       | 16.59(0.15)       | <b>7.46(0.03)</b>  | 8.20(0.06)        | 10.65(0.09)       | <b>6.92(0.03)</b>  | 6.96(0.05)        | 8.35(0.07)      |
| (IV) 1     | <b>24.10(0.17)</b> | 46.50(0.43)       | 67.34(0.65)       | <b>20.00(0.14)</b> | 30.95(0.28)       | 42.57(0.42)       | <b>17.80(0.12)</b> | 24.06(0.21)       | 31.83(0.30)     |
| 2          | <b>16.18(0.10)</b> | 29.75(0.27)       | 47.13(0.45)       | <b>13.63(0.08)</b> | 19.52(0.17)       | 27.86(0.25)       | <b>12.15(0.07)</b> | 15.23(0.12)       | 20.16(0.18)     |
| 3          | <b>12.03(0.06)</b> | 20.35(0.17)       | 33.42(0.31)       | <b>10.19(0.06)</b> | 13.48(0.11)       | 19.22(0.17)       | <b>9.11(0.05)</b>  | 10.52(0.08)       | 13.54(0.12)     |
| 4          | <b>9.58(0.05)</b>  | 14.49(0.11)       | 24.21(0.22)       | <b>8.15(0.04)</b>  | 9.87(0.07)        | 13.60(0.12)       | <b>7.32(0.03)</b>  | 7.75(0.05)        | 9.73(0.08)      |

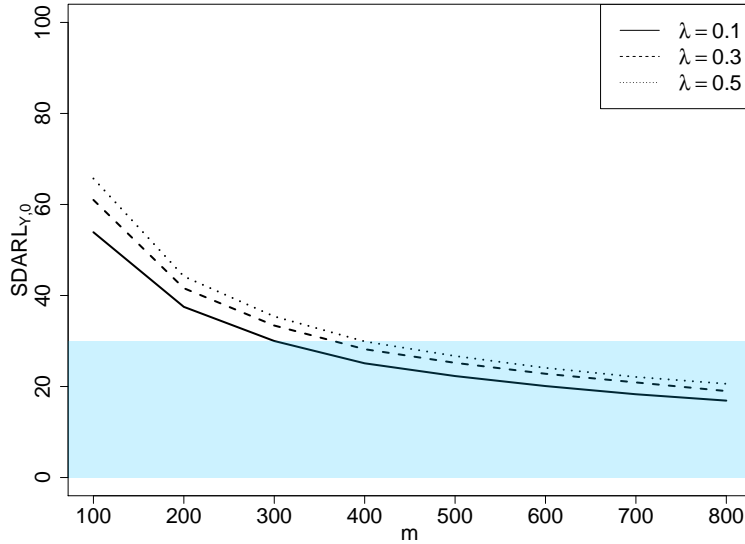

Figure S.3: Actual  $SDARL_{Y,0}$  values of the EWMAC chart when the IC data size  $m$  changes from 100 to 800,  $p = 1$ ,  $f(x) = 0.5 \exp(x)$  and  $\lambda = 0.1, 0.3$  and  $0.5$ . Shaded area denotes the  $SDARL_{Y,0}$  values that are within 15% of the nominal  $ARL_{Y,0}$  value 200.

Table S.4: Calculated  $ARL_1$  values and their standard errors (in parentheses) of the EWMA chart when the weighting function is chosen to be  $\phi_L(x; \lambda, h_{\mathbf{X}})$ ,  $ARL_{Y,0} = 200$ , and  $p = 50$ . In each row, numbers in italic denote cases with the smallest  $ARL_1$  values when comparing different  $ARL_{0,\mathbf{X}}$  values with  $\lambda$  fixed, and numbers in bold denote cases with the smallest  $ARL_1$  values when comparing different  $\lambda$  values with  $ARL_{0,\mathbf{X}}$  fixed.

| Type $\nu$ | $ARL_{\mathbf{X},0} = 100$ |                                |                   | $ARL_{\mathbf{X},0} = 200$   |                              |                 | $ARL_{\mathbf{X},0} = 300$ |                              |                    |
|------------|----------------------------|--------------------------------|-------------------|------------------------------|------------------------------|-----------------|----------------------------|------------------------------|--------------------|
|            | $\lambda = 0.1$            | $\lambda = 0.3$                | $\lambda = 0.5$   | $\lambda = 0.1$              | $\lambda = 0.3$              | $\lambda = 0.5$ | $\lambda = 0.1$            | $\lambda = 0.3$              | $\lambda = 0.5$    |
| (I)        | 1                          | 51.08(0.42) <b>42.50(0.39)</b> | 50.33(0.48)       | <b>24.04(0.17)</b>           | 32.19(0.29)                  | 41.69(0.40)     | <b>22.01(0.16)</b>         | <i>30.19(0.27)</i>           | <i>39.60(0.38)</i> |
|            | 2                          | 24.20(0.16) <b>20.83(0.18)</b> | 26.04(0.24)       | <b>13.79(0.08)</b>           | 16.36(0.13)                  | 21.52(0.20)     | <b>12.88(0.08)</b>         | <i>15.61(0.13)</i>           | <i>20.56(0.19)</i> |
|            | 3                          | 14.89(0.08) <b>12.09(0.09)</b> | 14.71(0.13)       | <b>9.48(0.05)</b>            | 10.02(0.07)                  | 12.55(0.11)     | <b>8.91(0.05)</b>          | <i>9.63(0.07)</i>            | <i>12.03(0.10)</i> |
|            | 4                          | 10.69(0.05) <b>8.08(0.06)</b>  | 9.30(0.08)        | 7.14(0.03) <b>6.91(0.05)</b> | 8.15(0.07)                   |                 | <i>6.79(0.03)</i>          | <b>6.67(0.04)</b>            | <i>7.87(0.06)</i>  |
| (II)       | 1                          | 28.51(0.21) <b>25.87(0.22)</b> | 31.88(0.30)       | <b>16.46(0.11)</b>           | 20.54(0.18)                  | 26.96(0.25)     | <b>15.33(0.10)</b>         | <i>19.49(0.17)</i>           | <i>25.79(0.24)</i> |
|            | 2                          | 13.08(0.07) <b>10.68(0.08)</b> | 12.77(0.11)       | <b>8.77(0.04)</b>            | 9.04(0.06)                   | 11.08(0.09)     | <b>8.28(0.04)</b>          | <i>8.72(0.06)</i>            | <i>10.66(0.09)</i> |
|            | 3                          | 8.31(0.03) <b>6.07(0.04)</b>   | 6.66(0.05)        | 5.87(0.02) <b>5.35(0.03)</b> | 6.00(0.04)                   |                 | <i>5.58(0.02)</i>          | <b>5.20(0.03)</b>            | <i>5.82(0.03)</i>  |
|            | 4                          | 6.08(0.02) <b>4.16(0.02)</b>   | 4.21(0.03)        | 4.33(0.02) <b>3.76(0.02)</b> | 3.87(0.02)                   |                 | <i>4.23(0.01)</i>          | <b>3.67(0.02)</b>            | <i>3.78(0.02)</i>  |
| (III)      | 1                          | <b>7.74(0.04)</b>              | <i>8.60(0.06)</i> | <i>10.90(0.09)</i>           | <b>8.09(0.04)</b>            | 8.91(0.06)      | 11.25(0.10)                | <b>8.37(0.04)</b>            | 9.13(0.07)         |
|            | 2                          | <i>5.42(0.02)</i>              | <b>5.32(0.03)</b> | <i>6.25(0.05)</i>            | 5.67(0.02) <b>5.50(0.03)</b> | 6.45(0.05)      |                            | 5.84(0.02) <b>5.63(0.03)</b> | 6.56(0.05)         |
|            | 3                          | <i>4.18(0.02)</i>              | <b>3.82(0.02)</b> | <i>4.11(0.03)</i>            | 4.39(0.02) <b>3.94(0.02)</b> | 4.24(0.03)      |                            | 4.52(0.02) <b>4.03(0.02)</b> | 4.33(0.03)         |
|            | 4                          | <i>3.40(0.01)</i>              | <b>2.99(0.01)</b> | <i>3.02(0.02)</i>            | 3.59(0.01) <b>3.09(0.01)</b> | 3.11(0.02)      |                            | 3.70(0.01) <b>3.15(0.01)</b> | 3.17(0.02)         |
| (IV)       | 1                          | <b>7.82(0.04)</b>              | <i>8.82(0.06)</i> | <i>11.29(0.10)</i>           | <b>8.22(0.04)</b>            | 9.22(0.07)      | 11.74(0.10)                | <b>8.56(0.04)</b>            | 9.48(0.07)         |
|            | 2                          | <b>5.51(0.02)</b>              | <i>5.52(0.03)</i> | <i>6.62(0.05)</i>            | 5.81(0.02) <b>5.75(0.03)</b> | 6.86(0.05)      |                            | 6.04(0.03) <b>5.92(0.04)</b> | 7.02(0.05)         |
|            | 3                          | <i>4.26(0.02)</i>              | <b>3.96(0.02)</b> | <i>4.37(0.03)</i>            | 4.50(0.02) <b>4.15(0.03)</b> | 4.53(0.03)      |                            | 4.68(0.02) <b>4.25(0.02)</b> | 4.65(0.03)         |
|            | 4                          | <i>3.47(0.01)</i>              | <b>3.11(0.01)</b> | <i>3.21(0.02)</i>            | 3.69(0.01) <b>3.24(0.01)</b> | 3.33(0.01)      |                            | 3.84(0.01) <b>3.32(0.01)</b> | 3.41(0.02)         |

Table S.5: Calculated  $ARL_1$  values and their standard errors (in parentheses) of the EWMA chart when the weighting function is chosen to be  $\phi_L(x; \lambda, h_{\mathbf{X}})$ ,  $ARL_{Y,0} = 200$ ,  $p = 1$ , and  $f(x) = 0.5 \exp(x)$ . In each row, numbers in italic denote cases with the smallest  $ARL_1$  values when comparing different  $ARL_{0,\mathbf{X}}$  values with  $\lambda$  fixed, and numbers in bold denote cases with the smallest  $ARL_1$  values when comparing different  $\lambda$  values with  $ARL_{0,\mathbf{X}}$  fixed.

| Type $\nu$ | $ARL_{\mathbf{X},0} = 100$ |                    |                    | $ARL_{\mathbf{X},0} = 200$ |                    |                   | $ARL_{\mathbf{X},0} = 300$ |                    |                   |             |
|------------|----------------------------|--------------------|--------------------|----------------------------|--------------------|-------------------|----------------------------|--------------------|-------------------|-------------|
|            | $\lambda = 0.1$            | $\lambda = 0.3$    | $\lambda = 0.5$    | $\lambda = 0.1$            | $\lambda = 0.3$    | $\lambda = 0.5$   | $\lambda = 0.1$            | $\lambda = 0.3$    | $\lambda = 0.5$   |             |
| (I)        | 1                          | <b>24.03(0.15)</b> | 27.82(0.24)        | 40.67(0.39)                | <b>14.12(0.08)</b> | 19.06(0.16)       | 28.53(0.26)                | <b>13.04(0.08)</b> | 17.41(0.14)       | 25.86(0.24) |
|            | 2                          | 12.29(0.06)        | <b>11.81(0.09)</b> | 17.09(0.15)                | <b>8.13(0.04)</b>  | 8.94(0.06)        | 12.45(0.10)                | <b>7.62(0.04)</b>  | 8.41(0.06)        | 11.45(0.09) |
|            | 3                          | 8.13(0.03)         | <b>6.75(0.04)</b>  | 8.57(0.07)                 | 5.71(0.02)         | <b>5.52(0.03)</b> | 6.79(0.05)                 | 5.39(0.02)         | <b>5.26(0.03)</b> | 6.39(0.05)  |
|            | 4                          | 6.10(0.02)         | <b>4.62(0.02)</b>  | 5.26(0.03)                 | 4.43(0.02)         | <b>3.91(0.02)</b> | 4.37(0.03)                 | 4.20(0.01)         | <b>3.78(0.01)</b> | 4.16(0.03)  |
| (II)       | 1                          | 14.30(0.10)        | <b>13.45(0.12)</b> | 15.20(0.14)                | <b>10.35(0.06)</b> | 11.28(0.09)       | 13.31(0.12)                | <b>9.82(0.06)</b>  | 10.77(0.09)       | 12.72(0.11) |
|            | 2                          | 9.08(0.05)         | <b>7.89(0.06)</b>  | 9.20(0.08)                 | 6.70(0.03)         | <b>6.63(0.05)</b> | 7.76(0.06)                 | <b>6.35(0.03)</b>  | 6.37(0.04)        | 7.40(0.06)  |
|            | 3                          | 6.55(0.03)         | <b>5.27(0.03)</b>  | 5.89(0.04)                 | 4.93(0.02)         | <b>4.54(0.03)</b> | 5.05(0.04)                 | 4.70(0.02)         | <b>4.37(0.03)</b> | 4.82(0.03)  |
|            | 4                          | 5.13(0.02)         | <b>3.86(0.02)</b>  | 4.07(0.03)                 | 3.92(0.01)         | <b>3.37(0.01)</b> | 3.54(0.02)                 | 3.74(0.01)         | <b>3.27(0.01)</b> | 3.41(0.02)  |
| (III)      | 1                          | <b>39.17(0.34)</b> | 60.25(0.56)        | 73.21(0.71)                | <b>42.00(0.37)</b> | 62.06(0.60)       | 73.41(0.72)                | <b>44.23(0.39)</b> | 63.60(0.62)       | 74.11(0.72) |
|            | 2                          | <b>26.58(0.22)</b> | 40.94(0.39)        | 52.23(0.51)                | <b>27.53(0.22)</b> | 41.53(0.40)       | 52.16(0.51)                | <b>28.77(0.23)</b> | 42.07(0.40)       | 51.88(0.51) |
|            | 3                          | <b>19.23(0.15)</b> | 28.88(0.27)        | 37.98(0.37)                | <b>19.63(0.15)</b> | 28.83(0.27)       | 37.09(0.36)                | <b>20.30(0.15)</b> | 29.12(0.27)       | 36.85(0.36) |
|            | 4                          | <b>14.58(0.11)</b> | 20.96(0.19)        | 27.97(0.27)                | <b>14.89(0.10)</b> | 20.83(0.19)       | 27.17(0.26)                | <b>15.47(0.11)</b> | 21.02(0.19)       | 26.89(0.26) |
| (IV)       | 1                          | <b>40.65(0.36)</b> | 63.94(0.62)        | 77.74(0.76)                | <b>45.88(0.41)</b> | 68.60(0.67)       | 80.18(0.79)                | <b>49.93(0.44)</b> | 71.37(0.69)       | 81.43(0.80) |
|            | 2                          | <b>28.30(0.24)</b> | 46.09(0.44)        | 58.64(0.58)                | <b>31.79(0.27)</b> | 50.04(0.48)       | 61.16(0.60)                | <b>34.74(0.29)</b> | 52.62(0.51)       | 62.73(0.61) |
|            | 3                          | <b>20.98(0.17)</b> | 33.93(0.32)        | 44.67(0.44)                | <b>23.33(0.18)</b> | 37.28(0.36)       | 46.95(0.46)                | <b>25.49(0.20)</b> | 39.22(0.38)       | 48.25(0.48) |
|            | 4                          | <b>16.04(0.12)</b> | 25.62(0.24)        | 34.62(0.34)                | <b>17.94(0.13)</b> | 28.01(0.26)       | 36.36(0.35)                | <b>19.58(0.15)</b> | 29.81(0.28)       | 37.73(0.36) |
